# Supplementary material for: Influence of secondary ice formation on tropical deep convective clouds simulated by the Unified Model
Source: Copernicus journal article supplement (doi:10.5194/acp-25-18549-2025), 2025-12-19
Supplement: Supplementary file 1 [file acp-25-18549-2025-supplement.pdf]

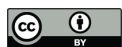

*Supplement of*

## **Influence of secondary ice formation on tropical deep convective clouds simulated by the Unified Model**

**Mengyu Sun et al.**

*Correspondence to:* Mengyu Sun ([mengyu.sun@manchester.ac.uk](mailto:mengyu.sun@manchester.ac.uk))

The copyright of individual parts of the supplement might differ from the article licence.

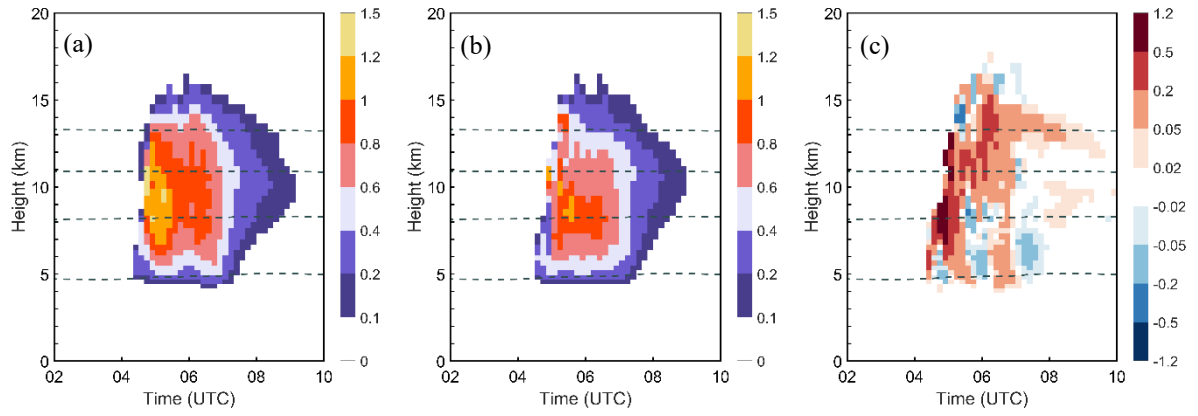

**Figure S1.** Time–height plots of ice water content (IWC;  $\text{g m}^{-3}$ ) for simulations: (a) all-SIP, (b) no-SIP, and the difference between allSIP and noSIP simulations (i.e., allSIP minus noSIP). Panels (a–c) are averaged over regions where  $\text{IWC} > 0.01 \text{ g m}^{-3}$ . The 0, –20, –40, and –60 °C isotherms are shown by the dashed lines.

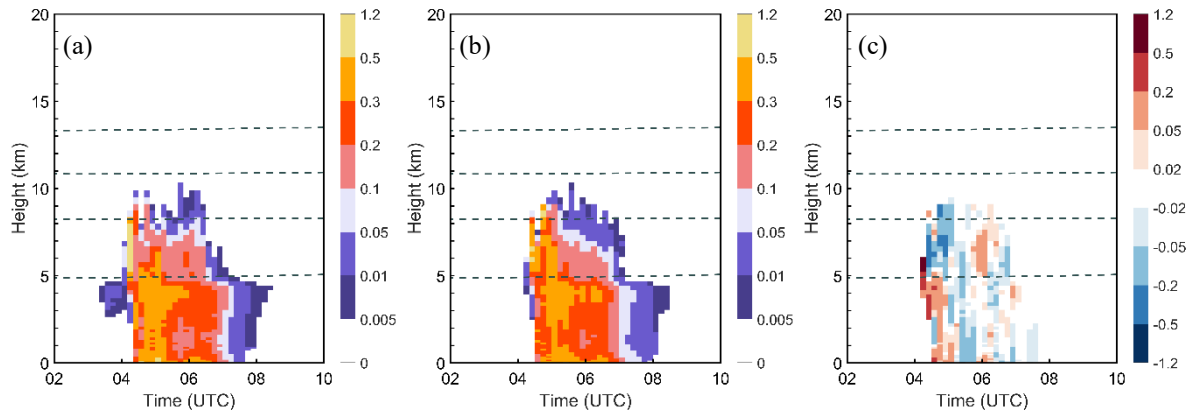

**Figure S2.** Same as Figure S1, but for rain water content (RWC;  $\text{g m}^{-3}$ ). RWC values are averaged over the area where either the ice water path or rain water path exceeds  $1 \text{ g m}^{-2}$ .
